# Supplementary material for: Rapid conversion of EUCOMM/KOMP-CSD alleles in mouse embryos using a cell-permeable Cre recombinase
Source: PubMed Central journal article supplement (PMC3890051; doi:10.1007/s11248-013-9764-x), 2013-11-07
Supplement: 11248_2013_9764_MOESM1_ESM.pdf [file 11248_2013_9764_MOESM1_ESM.pdf]

Supplemental Table 1. Rates of conversion to tm1b using CMV-Cre and natural matings.

| Gene          | Critical exon region (bp) | F1 mutants genotyped | F1 mutant mice showing somatic conversion | % F1 mice showing somatic conversion | F2 mutants genotyped | F2 mutants showing full tm1b conversion and no Cre allele present | % conversion to tm1b and no Cre allele present per strain | # days from first mating set up to first fully converted tm1b mouse detected with no Cre |
|---------------|---------------------------|----------------------|-------------------------------------------|--------------------------------------|----------------------|-------------------------------------------------------------------|-----------------------------------------------------------|------------------------------------------------------------------------------------------|
| 2610318N02Rik | 718                       | 13                   | 11                                        | 85%                                  | 30                   | 8                                                                 | 27%                                                       | 93                                                                                       |
| 3110035E14Rik | 590                       | 5                    | 0                                         | 0%                                   | 28                   | 8                                                                 | 29%                                                       | 178                                                                                      |
| Aldh3b1       | 3689                      | 22                   | 8                                         | 36%                                  | 4                    | 1                                                                 | 25%                                                       | 113                                                                                      |
| Ankrd6        | 0                         | 5                    | 2                                         | 40%                                  | 15                   | 3                                                                 | 20%                                                       | 141                                                                                      |
| Anxa9         | 1864                      | 14                   | 5                                         | 36%                                  | 19                   | 2                                                                 | 11%                                                       | 96                                                                                       |
| Ap2a2         | 744                       | 11                   | 5                                         | 45%                                  | 18                   | 2                                                                 | 11%                                                       | 91                                                                                       |
| Cdkn2aipnl    | 629                       | 16                   | 5                                         | 31%                                  | 4                    | 3                                                                 | 75%                                                       | 84                                                                                       |
| Cnbd1         | 595                       | 33                   | 10                                        | 30%                                  | 51                   | 12                                                                | 24%                                                       | 95                                                                                       |
| Cyp2r1        | 758                       | 24                   | 9                                         | 38%                                  | 32                   | 7                                                                 | 22%                                                       | 94                                                                                       |
| Dbn1          | 2019                      | 9                    | 9                                         | 100%                                 | 11                   | 1                                                                 | 9%                                                        | 176                                                                                      |
| Dennd1c       | 1311                      | 17                   | 3                                         | 18%                                  | 48                   | 4                                                                 | 8%                                                        | 154                                                                                      |
| Exoc3l2       | 947                       | 15                   | 5                                         | 33%                                  | 20                   | 7                                                                 | 35%                                                       | 189                                                                                      |
| Fbxo33        | 2325                      | 31                   | 1                                         | 3%                                   | 6                    | 1                                                                 | 17%                                                       | 145                                                                                      |
| Gpr152        | 1975                      | 20                   | 13                                        | 65%                                  | 11                   | 1                                                                 | 9%                                                        | 127                                                                                      |
| Leprot        | 653                       | 23                   | 4                                         | 17%                                  | 94                   | 9                                                                 | 10%                                                       | 190                                                                                      |
| Lgals7        | 1357                      | 6                    | 2                                         | 33%                                  | 18                   | 3                                                                 | 17%                                                       | 137                                                                                      |
| Man2b2        | 699                       | 16                   | 13                                        | 81%                                  | 20                   | 7                                                                 | 35%                                                       | 104                                                                                      |
| Mybphl        | 2191                      | 21                   | 8                                         | 38%                                  | 83                   | 4                                                                 | 5%                                                        | 145                                                                                      |
| Prrg2         | 1545                      | 12                   | 7                                         | 58%                                  | 8                    | 4                                                                 | 50%                                                       | 115                                                                                      |
| Rbmx          | 760                       | 28                   | 2                                         | 7%                                   | 23                   | 1                                                                 | 4%                                                        | 131                                                                                      |
| Rhox13        | 567                       | 31                   | 21                                        | 68%                                  | 35                   | 3                                                                 | 9%                                                        | 218                                                                                      |
| Ropn1l        | 556                       | 16                   | 7                                         | 44%                                  | 36                   | 16                                                                | 44%                                                       | 95                                                                                       |
| Selk          | 1106                      | 29                   | 4                                         | 14%                                  | 88                   | 17                                                                | 19%                                                       | 103                                                                                      |
| Sfxn3         | 1730                      | 8                    | 4                                         | 50%                                  | 34                   | 12                                                                | 35%                                                       | 99                                                                                       |

|              |      |            |            |            |            |            |            |     |
|--------------|------|------------|------------|------------|------------|------------|------------|-----|
| Slitrk4      | 4501 | 19         | 18         | 95%        | 24         | 15         | 63%        | 115 |
| Smpd4        | 964  | 11         | 1          | 9%         | 38         | 13         | 34%        | 144 |
| Tatdn3       | 616  | 9          | 5          | 56%        | 5          | 1          | 20%        | 94  |
| Tceal5       | 1345 | 23         | 18         | 78%        | 8          | 5          | 63%        | 191 |
| Tmc3         | 689  | 9          | 3          | 33%        | 6          | 2          | 33%        | 102 |
| Tomm20l      | 688  | 4          | 2          | 50%        | 11         | 1          | 9%         | 195 |
| Trim29       | 3450 | 12         | 6          | 50%        | 24         | 4          | 17%        | 88  |
| Wnt16        | 877  | 9          | 9          | 100%       | 8          | 5          | 63%        | 111 |
| Zfp719       | 689  | 14         | 1          | 7%         | 35         | 3          | 9%         | 206 |
| Zkscan17     | 646  | 22         | 5          | 23%        | 31         | 6          | 19%        | 103 |
| <b>Total</b> |      | <b>557</b> | <b>226</b> | <b>41%</b> | <b>926</b> | <b>191</b> | <b>21%</b> |     |

Supplemental Table 2. Conversion rates to tm1b using cell permeable HTN-Cre via IVF

| Gene          | Critical exon region (bp) | Total hets | Tm1a | Tm1b | Mosaics detected | incorrect allele conversion | % full conversion |
|---------------|---------------------------|------------|------|------|------------------|-----------------------------|-------------------|
| 1700007K13Rik | 555                       | 14         | 0    | 11   | 2                | 1                           | 79%               |
| Adamts3       | 997                       | 3          | 0    | 3    | 0                | 0                           | 100%              |
| Alox12e       | 3036                      | 5          | 0    | 5    | 0                | 0                           | 100%              |
| Ankrd6        | 0                         | 6          | 4    | 1    | 1                | 0                           | 17%               |
| Ap4e1         | 671                       | 5          | 0    | 5    | 0                | 0                           | 100%              |
| Camkmt        | 843                       | 13         | 0    | 13   | 0                | 0                           | 100%              |
| Casc4         | 671                       | 3          | 0    | 2    | 1                | 0                           | 67%               |
| Ccdc127       | 722                       | 12         | 0    | 5    | 3                | 4                           | 42%               |
| Cdbl          | 822                       | 4          | 1    | 3    | 0                | 0                           | 75%               |
| Cpt2          | 647                       | 14         | 0    | 13   | 1                | 0                           | 93%               |
| Ctr9          | 1734                      | 5          | 2    | 0    | 3                | 0                           | 0%                |
| Cttnbp2       | 2234                      | 14         | 0    | 13   | 1                | 0                           | 93%               |
| D630023F18Rik | 979                       | 8          | 0    | 6    | 1                | 1                           | 75%               |
| Dhodh         | 643                       | 5          | 1    | 0    | 2                | 2                           | 0%                |
| Dip2a         | 1576                      | 8          | 3    | 4    | 1                | 0                           | 50%               |
| Dnajc8        | 532                       | 3          | 0    | 3    | 0                | 0                           | 100%              |
| Dnase1l2      | 0                         | 7          | 0    | 7    | 0                | 0                           | 100%              |
| Eci3          | 613                       | 9          | 0    | 9    | 0                | 0                           | 100%              |
| Eil2          | 659                       | 5          | 2    | 3    | 0                | 0                           | 60%               |
| Exoc3l2       | 947                       | 5          | 0    | 2    | 1                | 2                           | 40%               |
| Fbxo33        | 2325                      | 1          | 0    | 1    | 0                | 0                           | 100%              |
| Fbxo7         | 659                       | 5          | 0    | 3    | 2                | 0                           | 60%               |
| Galnt18       | 708                       | 9          | 0    | 9    | 0                | 0                           | 100%              |
| Gm13125       | 979                       | 2          | 0    | 1    | 1                | 0                           | 50%               |
| Gm16515       | 682                       | 2          | 0    | 2    | 0                | 0                           | 100%              |
| Gmnc          | 1643                      | 13         | 0    | 12   | 0                | 1                           | 92%               |
| Hibadh        | 721                       | 6          | 0    | 6    | 0                | 0                           | 100%              |

|          |      |    |   |    |   |   |      |
|----------|------|----|---|----|---|---|------|
| Kif24    | 802  | 5  | 0 | 5  | 0 | 0 | 100% |
| Kif3b    | 2086 | 9  | 0 | 8  | 1 | 0 | 89%  |
| Klf17    | 1606 | 2  | 0 | 1  | 0 | 1 | 50%  |
| Krt7     | 756  | 13 | 0 | 11 | 2 | 0 | 85%  |
| Lonrf3   | 845  | 4  | 0 | 4  | 0 | 0 | 100% |
| Medag    | 612  | 9  | 0 | 9  | 0 | 0 | 100% |
| Metrnl   | 953  | 9  | 0 | 8  | 1 | 0 | 89%  |
| Mroh4    | 1321 | 14 | 1 | 9  | 4 | 0 | 64%  |
| Mrps5    | 1887 | 3  | 0 | 3  | 0 | 0 | 100% |
| Nubpl    | 698  | 6  | 0 | 6  | 0 | 0 | 100% |
| Nxn      | 701  | 4  | 1 | 3  | 0 | 0 | 75%  |
| Pced1a   | 1477 | 2  | 0 | 1  | 0 | 1 | 50%  |
| Pdcd2    | 873  | 10 | 0 | 10 | 0 | 0 | 100% |
| Pdia4    | 926  | 6  | 1 | 1  | 4 | 0 | 17%  |
| Plscr2   | 1144 | 11 | 0 | 8  | 3 | 0 | 73%  |
| Ppil3    | 649  | 17 | 0 | 16 | 1 | 0 | 94%  |
| Prkab1   | 728  | 13 | 2 | 11 | 0 | 0 | 85%  |
| Rbmx     | 760  | 5  | 1 | 4  | 0 | 0 | 80%  |
| Reg3d    | 960  | 11 | 0 | 9  | 2 | 0 | 82%  |
| Rnf157   | 815  | 3  | 0 | 3  | 0 | 0 | 100% |
| Rundc1   | 524  | 3  | 0 | 3  | 0 | 0 | 100% |
| Rwdd1    | 668  | 3  | 1 | 0  | 2 | 0 | 0%   |
| Sgsm1    | 751  | 6  | 0 | 5  | 1 | 0 | 83%  |
| Slc25a28 | 763  | 10 | 0 | 10 | 0 | 0 | 100% |
| Smpd4    | 964  | 6  | 3 | 0  | 3 | 0 | 0%   |
| Stard8   | 1974 | 6  | 0 | 5  | 1 | 0 | 83%  |
| Tgfb1i1  | 2052 | 6  | 0 | 6  | 0 | 0 | 100% |
| Tmc3     | 689  | 4  | 1 | 2  | 1 | 0 | 50%  |
| Trappc10 | 1162 | 5  | 0 | 5  | 0 | 0 | 100% |
| Trmt2a   | 1596 | 3  | 0 | 3  | 0 | 0 | 100% |

|              |      |            |           |            |           |           |            |
|--------------|------|------------|-----------|------------|-----------|-----------|------------|
| Vps13a       | 631  | 3          | 0         | 3          | 0         | 0         | 100%       |
| Zfp182       | 1029 | 7          | 0         | 3          | 4         | 0         | 43%        |
| Zfp287       | 524  | 3          | 1         | 1          | 0         | 1         | 33%        |
| Zfp408       | 3302 | 3          | 0         | 2          | 1         | 0         | 67%        |
| Zfp616       | 1193 | 5          | 0         | 5          | 0         | 0         | 100%       |
| Zfp84        | 2795 | 3          | 0         | 3          | 0         | 0         | 100%       |
| Zfyve28      | 732  | 5          | 0         | 5          | 0         | 0         | 100%       |
| <b>Total</b> |      | <b>423</b> | <b>25</b> | <b>333</b> | <b>51</b> | <b>14</b> | <b>79%</b> |

Supplemental Table 3. Embryos cultured from 2-cell to blastocysts and survival rates.

| Gene                  | # Embryos Cultured | # Survived to blastocyst | % Survival |
|-----------------------|--------------------|--------------------------|------------|
| Adamts3               | 10                 | 10                       | 100        |
| Alox12e               | 17                 | 14                       | 82         |
| WT C57BL/6N (Taconic) | 14                 | 13                       | 93         |
| Dip2a                 | 17                 | 16                       | 94         |
| Klf17                 | 19                 | 19                       | 100        |
| Klf17                 | 12                 | 11                       | 92         |
| Rosa26 lacZ reporter  | 19                 | 19                       | 100        |
| Rosa26 lacZ reporter  | 11                 | 10                       | 91         |
| Mkxn2                 | 7                  | 7                        | 100        |
| Mrps5                 | 10                 | 9                        | 90         |
| Pcd1a                 | 28                 | 26                       | 93         |
| Pld3                  | 14                 | 11                       | 79         |
| Prkab1                | 22                 | 20                       | 91         |
| Rundc1                | 17                 | 15                       | 88         |
| Rundc1                | 13                 | 13                       | 100        |
| Stard8                | 20                 | 20                       | 100        |
| Tmc3                  | 16                 | 16                       | 100        |
| <b>Total</b>          | <b>266</b>         | <b>249</b>               | <b>94</b>  |
