# Supplementary material for: Rapid conversion of EUCOMM/KOMP-CSD alleles in mouse embryos using a cell-permeable Cre recombinase
Source: PubMed Central journal article supplement (PMC3890051; doi:10.1007/s11248-013-9764-x), 2013-11-07
Supplement: 11248_2013_9764_MOESM2_ESM.pdf [file 11248_2013_9764_MOESM2_ESM.pdf]

## Supplementary information

**S1** - CMV-Cre takes a minimum of two generations to convert tm1a to tm1b with the Cre driver removed. The ratio of fully converted mice to other genotypes is also very low, even if the conversion rate to tm1b is 100%.

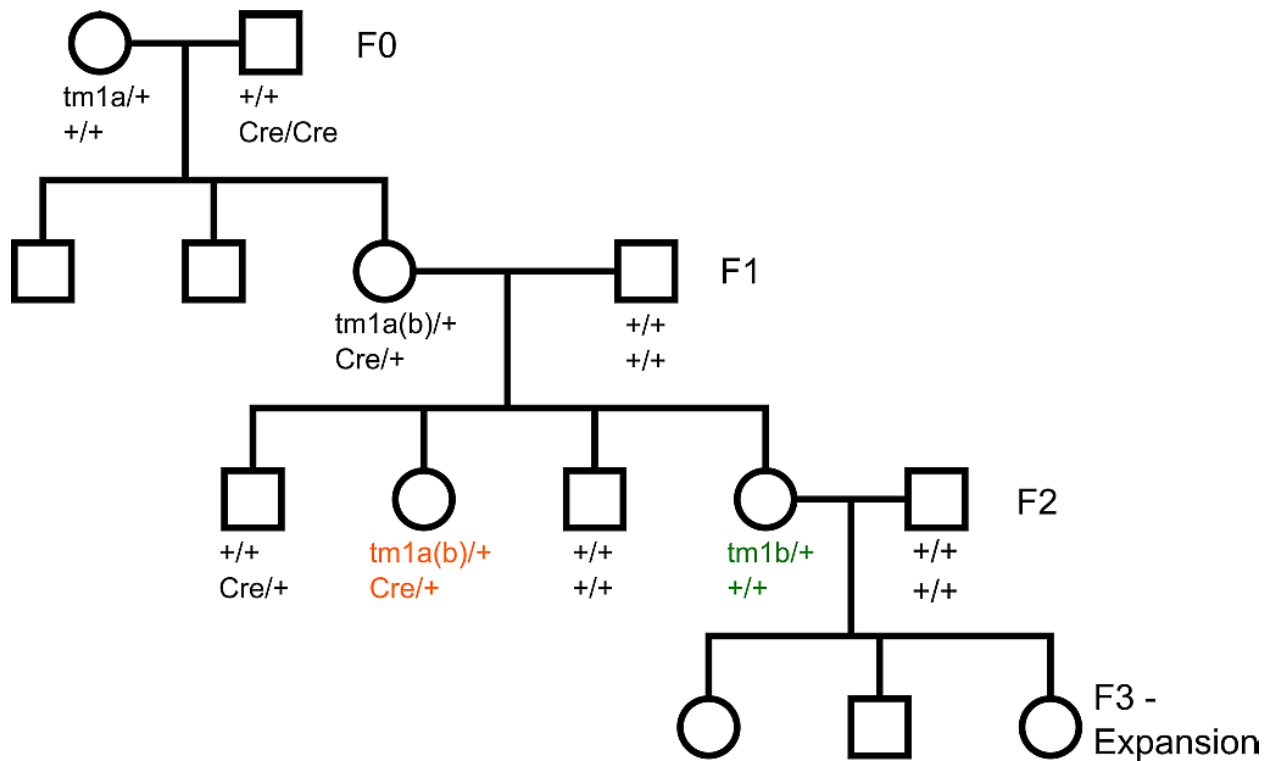

**S2** - Cell permeable Cre incubation 2 cell embryos. Drops 1 and 2: 2 x 130µl DMEM wash drops.  
 Drop 3: 1 x 50µl DMEM + HTN-Cre. Drops 4 and 5: 2 x 130µl HTF wash drops post Cre drops 4 and 5. All drops are overlaid with mineral oil.

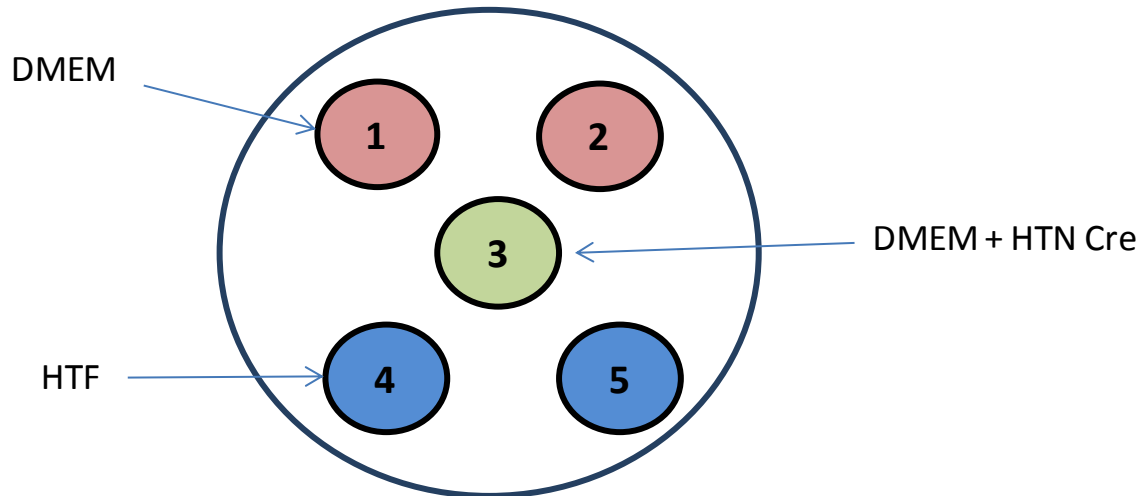

### S3 – PCR conditions

Short range primer sequences and PCR assays for tm1b and Cre detection

| Primer name | Sequence              |
|-------------|-----------------------|
| Cre_F       | CATTTGGGCCAGCTAAACAT  |
| Cre_R       | TAAGCAATCCCCAGAAATGC  |
| Floxed PNF  | ATCCGGGGGTACCGCGTCGAG |
| Floxed LR   | ACTGATGGCGAGCTCAGACC  |
| Tm1b_prom_F | CGGTCGCTACCATTACAGT   |

| Assay | F primer    | R primer  | Size (bp) | Type     |
|-------|-------------|-----------|-----------|----------|
| Cre   | Cre_F       | Cre_R     | 233       | Cre      |
| Flox  | Floxed PNF  | Floxed LR | variable  | LoxP     |
| Tm1b  | Tm1b_prom_F | Floxed LR | 380       | cassette |

*Short Range PCR reagents and cycling conditions*

| Reagent                  | volume (ul) |
|--------------------------|-------------|
| Primer 1 (10uM)          | 0.3         |
| Primer 2 (10uM)          | 0.3         |
| MgCl <sub>2</sub> (50mM) | 0.45        |
| 10x Buffer               | 1.5         |
| dNTP (100mM)             | 0.15        |
| Taq*                     | 0.15        |
| ddH <sub>2</sub> O       | 11.15       |
| DNA                      | 1           |
| <b>Total</b>             | <b>15</b>   |

\*Platinum Taq is used in the PCR reaction (Invitrogen)

PCR conditions

- 1 94 °C 5 min
- 2 94 °C 30 sec
- 3 58 °C 30 sec
- 4 72 °C 45 sec
- 5 Go to '2' + 34 cycles
- 6 72 °C 5 min
- 7 12 °C forever

qPCR assay sequences

| Assay     | F primer                       | R primer               | Probe                      |
|-----------|--------------------------------|------------------------|----------------------------|
| LacZ      | GGAGTGCATCTTCTGAGG             | CGCATCGTAACCGTGCATC    | CGATACTGTCGTCGTCCTCAAACCTG |
| Neo       | GGTGGAGAGGCTATTCGGC            | GAACACGGCGGCATCAG      | TGGGCACAACAGACAATCGGCTG    |
| Tm1b_prom | GTCCAAACTCATCAATGTATCTTATCATGT | GATGGCGAGCTCAGACCATAA  | TGGATCCGGAATAACTTCGTA      |
| Cre       | ACGTACTGACGGTGGGAGAA           | GTGCTAACCAGCGTTTTTCGTT | CTGCCAATATGGATTAACA        |

*qPCR reagents and cycling conditions*

| Reagent                      | Volume (ul) |
|------------------------------|-------------|
| 2x GTXpress buffer*          | 5           |
| 60x TaqMan assay             | 0.166       |
| ddH <sub>2</sub> O           | 3.334       |
| 20x endogenous probe (Tfrc)* | 0.5         |
| DNA                          | 1           |

\*Applied Biosystems

95°C 20sec } x1  
 95°C 10sec } x35  
 60°C 30sec }

**S4 – Genotyping and tm1b conversion detection using the universal short range PCR assays**

Size differences in the end-point PCR reactions can detect partial and mosaic conversion of the mutant allele (data shown for promoter-driven lines). In this example the tm1b assay detects full conversion to tm1b in three samples and partial conversion to tm1b.2 in two others. The flox assay (performed on different samples and shown here for illustrative purposes) detects conversion to tm1b.1 in two samples and no conversion in two others. The remaining sample shows mosaicism where both the tm1a and tmb.1 forms are detected.

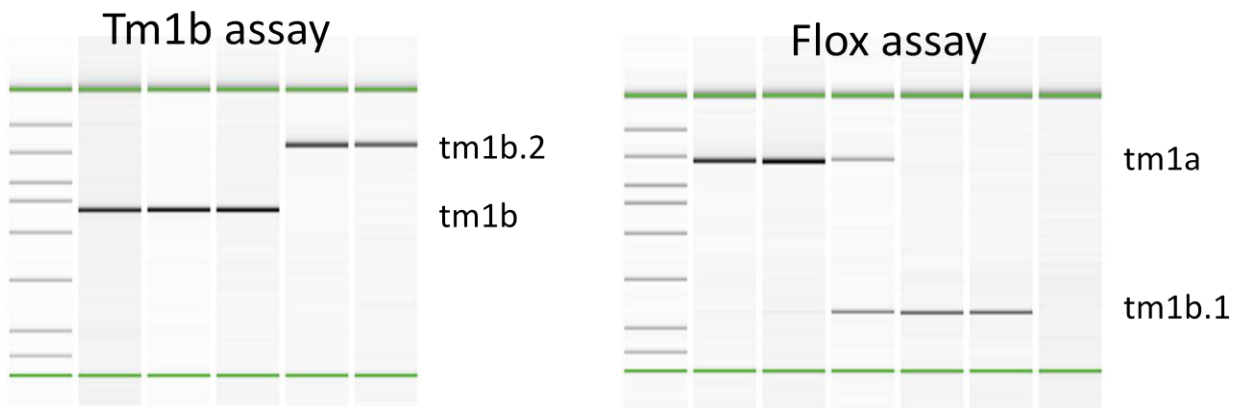

## S5 – Genotyping of cell permeable Cre-treated samples

All nine samples which are heterozygous for LacZ show tm1b conversion. Mouse MZBG3.1a also shows some mosaic conversion to tm1b.1. No tm1a is detected in any of the samples. The upper and lower green bands are alignment markers used by the fragment analysis software (Qiagen)

| Mouse    | SR result  |  |            |  | qPCR results |     |           | Genotypes |        |
|----------|------------|--|------------|--|--------------|-----|-----------|-----------|--------|
|          | Flox assay |  | Tm1b assay |  | LacZ         | Neo | Tm1b_prom | Tm1(a)    | Tm1(b) |
| MZBG1.1a |            |  |            |  | +/+          | +/+ | +/+       | +/+       | +/+    |
| MZBG1.1b |            |  |            |  | +/-          | +/+ | +/-       | +/+       | +/-    |
| MZBG1.1c |            |  |            |  | +/+          | +/+ | +/+       | +/+       | +/+    |
| MZBG1.1d |            |  |            |  | +/-          | +/+ | +/-       | +/+       | +/-    |
| MZBG1.1e |            |  |            |  | +/-          | +/+ | +/-       | +/+       | +/-    |
| MZBG2.1a |            |  |            |  | +/+          | +/+ | +/+       | +/+       | +/+    |
| MZBG2.1b |            |  |            |  | +/-          | +/+ | +/-       | +/+       | +/-    |
| MZBG2.1c |            |  |            |  | +/+          | +/+ | +/+       | +/+       | +/+    |
| MZBG2.1d |            |  |            |  | +/-          | +/+ | +/-       | +/+       | +/-    |
| MZBG3.1a |            |  |            |  | +/-          | +/+ | +/-       | +/+       | +/-    |
| MZBG3.1b |            |  |            |  | +/-          | +/+ | +/-       | +/+       | +/-    |
| MZBG3.1c |            |  |            |  | +/-          | +/+ | +/-       | +/+       | +/-    |
| MZBG3.1d |            |  |            |  | +/+          | +/+ | +/+       | +/+       | +/+    |
| MZBG3.1e |            |  |            |  | +/+          | +/+ | +/+       | +/+       | +/+    |
| MZBG3.1f |            |  |            |  | +/+          | +/+ | +/+       | +/+       | +/+    |
| MZBG3.1g |            |  |            |  | +/-          | +/+ | +/-       | +/+       | +/-    |
